# Supplementary material for: Cardiac Surgery Compared With Antibiotics Only in Patients Developing Infective Endocarditis After Transcatheter Aortic Valve Replacement
Source: PubMed Central journal article supplement — J Am Heart Assoc. 2018 Aug 31;7(17):e010027. doi: 10.1161/JAHA.118.010027 (PMC6201426; doi:10.1161/jaha.118.010027), 2018-08-31
Supplement: JAH3-7-e010027-s001.pdf [file JAH3-7-e010027-s001.pdf]

# **SUPPLEMENTAL MATERIAL**

**Table S1. Procedural characteristics for TAVR in the unmatched cohort.**

|                                   | <b>IE-CS, n=20</b> | <b>IE-ABx, n=44</b> | <b>OR (95%-CI) or<br/>SMD (95%-CI)</b> | <b>P-value</b> |
|-----------------------------------|--------------------|---------------------|----------------------------------------|----------------|
| Indication                        |                    |                     |                                        |                |
| Native valve                      | 19/20 (95.0)       | 42/44 (95.5)        | 0.91 (0.08; 10.60)                     | 1.000          |
| valve-in-valve                    | 1/20 (5.0)         | 2/44 (4.5)          |                                        |                |
| Type of Valve                     |                    |                     |                                        |                |
| All self-expandable, n (%)        | 7/20 (35.0)        | 30/44 (68.2)        | 0.25 (0.08; 0.77)                      | 0.013          |
| All balloon-expandable, n (%)     | 13/20 (65.0)       | 14/44 (31.8)        |                                        |                |
| Access site                       |                    |                     |                                        |                |
| Trans-femoral, n (%)              | 15/20 (75.0)       | 42/44 (95.5)        | 0.14 (0.03; 0.82)                      | 0.026          |
| Trans-apical, n (%)               | 5/20 (25.0)        | 2/44 (4.5)          |                                        |                |
| Procedure Time [min]              | 47 (37; 65)        | 45 (36; 57)         | -0.11 (-0.34; 0.34)                    | 0.573          |
| Contrast dye [ml]                 | 113 (71; 138)      | 112 (95; 144)       | 0.14 (-0.25; 0.68)                     | 0.487          |
| Post-dilatation, n (%)            | 2/20 (10.0)        | 16/41 (39.0)        | 5.76 (1.18; 28.24)                     | 0.02           |
| Device success, n (%)             | 18/20 (90.0)       | 37/44 (84.1)        | 0.59 (0.11; 3.12)                      | 0.708          |
| Residual AI $\geq$ grade 2, n (%) | 0/13 (0)           | 6/40 (15.0)         | n.a.                                   | 0.317          |
| Residual mean gradient [mmHg]     | 11 (8; 16)         | 9 (7; 15)           | -0.02 (-0.42; 0.59)                    | 0.479          |

|                                      |                |                |                    |       |
|--------------------------------------|----------------|----------------|--------------------|-------|
| Aortic valve area [cm <sup>2</sup> ] | 1.5 (1.2; 2.0) | 1.8 (1.5; 2.4) | 0.02 (-0.46; 0.78) | 0.131 |
| VARC Myocardial infarction, n (%)    | 0/20 (0)       | 0/43 (0)       | n.a.               | n.a.  |
| VARC Stroke, n (%)                   | 2/20 (10.0)    | 2/44 (4.5)     | 0.43 (0.06; 3.28)  | 0.583 |
| VARC Renal Failure, n (%)            | 2/20 (10.0)    | 11/44 (25.0)   | 3.00 (0.60; 15.04) | 0.201 |
| VARC Bleeding, n (%)                 | 8/20 (40.0)    | 14/44 (31.8)   | 0.70 (0.23; 2.10)  | 0.523 |
| VARC Access site complication, n (%) | 8/40 (40.0)    | 7/44 (15.9)    | 0.28 (0.09; 0.95)  | 0.055 |
| New PPM/ICD, n (%)                   | 5/20 (25.0)    | 10/44 (22.7)   | 0.88 (0.26; 3.03)  | 1.000 |

Variables are expressed as numbers and percentages or median (25th - 75th percentile) as appropriate. Treatment effect is given as odds ratio (OR) and standardized mean difference (SMD). VARC indicates valve academic research consortium; PPM, permanent pacemaker; ICD, implantable cardioverter defibrillator.

**Table S2. Different indications for cardiac surgery in the unmatched and matched cohort.**

| <b>Indications for cardiac surgery in the unmatched cohort</b> |                        |                         |                      |                     |
|----------------------------------------------------------------|------------------------|-------------------------|----------------------|---------------------|
|                                                                | <b>IE-CS,<br/>n=20</b> | <b>IE-ABx,<br/>n=44</b> | <b>OR (95%-CI)</b>   | <b>P-<br/>value</b> |
| Indication Heart failure, n (%)                                | 11/20<br>(55.0)        | 17/43 (39.5)            | 0.54 (0.18;<br>1.56) | 0.250               |
| Indication sepsis/septic shock, n<br>(%)                       | 14/20<br>(70.0)        | 22/43 (51.2)            | 0.45 (0.15;<br>1.39) | 0.160               |
| Indication large vegetation, n (%)                             | 14/20<br>(70.0)        | 18/43 (41.9)            | 0.31 (0.10;<br>0.96) | 0.038               |
| Indication structural complication,<br>n (%)                   | 7/20 (35.0)            | 11/43 (25.6)            | 0.64 (0.20;<br>2.01) | 0.441               |
| Indication systemic embolism, n<br>(%)                         | 5/20 (25.0)            | 7/43 (16.3)             | 0.58 (0.16;<br>2.13) | 0.496               |
| <b>Indications for cardiac surgery in the matched cohort</b>   |                        |                         |                      |                     |
|                                                                | <b>IE-CS,<br/>n=20</b> | <b>IE-ABx,<br/>n=20</b> | <b>OR (95%-CI)</b>   | <b>P-<br/>value</b> |
| Indication Heart failure, n (%)                                | 11/20<br>(55.0)        | 8/20 (40.0)             | 0.55 (0.16;<br>1.91) | 0.342               |
| Indication sepsis/septic shock, n<br>(%)                       | 14/20<br>(70.0)        | 14/20 (70.0)            | 1.00 (0.26;<br>3.87) | 1.000               |
| Indication large vegetation, n (%)                             | 14/20<br>(70.0)        | 13/20 (65.0)            | 0.80 (0.21;<br>3.00) | 0.736               |
| Indication structural complication,<br>n (%)                   | 7/20 (35.0)            | 8/20 (40.0)             | 1.24 (0.34;<br>4.46) | 0.744               |

|                                        |             |             |                      |       |
|----------------------------------------|-------------|-------------|----------------------|-------|
| Indication systemic embolism, n<br>(%) | 5/20 (25.0) | 6/20 (30.0) | 1.29 (0.32;<br>5.18) | 0.723 |
|----------------------------------------|-------------|-------------|----------------------|-------|

Variables are expressed as numbers and percentages. Treatment effect is given as odds ratio (OR).

**Table S3. Procedural characteristics for TAVR in the matched cohort.**

|                                      | <b>IE-CS, n=20</b> | <b>IE-ABx, n=20</b> | <b>OR (95%-CI) or<br/>SMD (95%-CI)</b> | <b>P-value</b> |
|--------------------------------------|--------------------|---------------------|----------------------------------------|----------------|
| Indication                           |                    |                     |                                        |                |
| Native valve                         | 19/20 (95.0)       | 20/20 (100)         | n.a.                                   | 1.000          |
| valve-in-valve                       | 1/20 (5.0)         | 0/20 (0)            |                                        |                |
| Type of Valve                        |                    |                     |                                        |                |
| All self-expandable, n (%)           | 7/20 (35.0)        | 15/20 (75.0)        | 0.18 (0.05; 0.70)                      | 0.011          |
| All balloon-expandable, n (%)        | 13/20 (65.0)       | 5/25 (25.0)         |                                        |                |
| Access site                          |                    |                     |                                        |                |
| Trans-femoral, n (%)                 | 15/20 (75.0)       | 20/20 (100)         | n.a.                                   | 0.047          |
| Trans-apical, n (%)                  | 5/20 (25.0)        | 0/20 (0)            |                                        |                |
| Procedure Time [min]                 | 47 (37; 65)        | 45 (34; 53)         | -0.04 (-0.43; 0.57)                    | 0.597          |
| Contrast dye [ml]                    | 113 (71; 138)      | 121 (89; 149)       | 0.23 (-0.23; 0.86)                     | 0.357          |
| Post-dilatation, n (%)               | 2/20 (10.0)        | 8/17 (47.1)         | 8.00 (1.40; 45.76)                     | 0.023          |
| Device success, n (%)                | 18/20 (90.0)       | 19/20 (95.0)        | 2.11 (0.18; 25.35)                     | 1.000          |
| Residual AI $\geq$ grade 2, n (%)    | 0/13 (0)           | 1/18 (5.6)          | n.a.                                   | 1.000          |
| Residual mean gradient [mmHg]        | 11 (8; 16)         | 10 (7; 15)          | -0.08 (-0.47; 0.52)                    | 0.769          |
| Aortic valve area [cm <sup>2</sup> ] | 1.5 (1.2; 2.0)     | 1.9 (1.5; 2.3)      | 0.15 (-0.41; 1.02)                     | 0.252          |

|                                      |             |              |                    |       |
|--------------------------------------|-------------|--------------|--------------------|-------|
| VARC Myocardial infarction, n (%)    | 0/20 (0)    | 0/20 (0)     | n.a.               | n.a.  |
| VARC Stroke, n (%)                   | 2/20 (10.0) | 1/20 (1.000) | 0.47 (0.04; 5.69)  | 1.000 |
| VARC Renal Failure, n (%)            | 2/20 (10.0) | 3/20 (15.0)  | 1.59 (0.24; 10.70) | 1.000 |
| VARC Bleeding, n (%)                 | 8/20 (40.0) | 9/20 (45.0)  | 1.23 (0.35; 4.31)  | 0.749 |
| VARC Access site complication, n (%) | 8/40 (40.0) | 3/20 (15.0)  | 0.27 (0.06; 1.21)  | 0.077 |
| New PPM/ICD, n (%)                   | 5/20 (25.0) | 4/20 (20.0)  | 0.75 (0.17; 3.33)  | 1.000 |

Variables are expressed as numbers and percentages or median (25<sup>th</sup> - 75th percentile) as appropriate. Treatment effect is given as odds ratio (OR) and standardized mean difference (SMD). VARC indicates valve academic research consortium; PPM, permanent pacemaker; ICD, implantable cardioverter defibrillator.

**Table S4. Characteristics according to 1-year mortality (unmatched cohort).**

|                                      | alive, n=21          | dead, n=43           | OR (95%-CI) or<br>SMD (95%-CI) | p-value |
|--------------------------------------|----------------------|----------------------|--------------------------------|---------|
| <b>Baseline (at diagnosis of IE)</b> |                      |                      |                                |         |
| Age [years]                          | 80.0±6.1             | 80.3±5.8             | 0.01 (-0.31; 0.45)             | 0.836   |
| Male Sex [n/%]                       | 16/21 (76.2)         | 22/43 (51.2)         | 0.33 (0.10; 1.05)              | 0.056   |
| Body Mass Index [kg/m <sup>2</sup> ] | 28.0 (24.2;<br>31.8) | 28.3 (24.4;<br>32.1) | -0.04 (-0.30; 0.49)            | 0.838   |
| STS-Score [%]                        | 16.1 (8.8; 25.6)     | 21.8 (14.5;<br>35.1) | 0.53 (0.05; 1.11)              | 0.025   |
| NYHA III/IV, n (%)                   | 17/20 (85.0)         | 29/41 (70.7)         | 0.43 (0.11; 1.73)              | 0.344   |
| CAD, n (%)                           | 8/21 (38.1)          | 24/43 (55.8)         | 2.05 (0.71; 5.97)              | 0.183   |
| Diabetes mellitus, n (%)             | 7/21 (33.3)          | 23/43 (53.5)         | 2.30 (0.78; 6.82)              | 0.129   |
| Atrial fibrillation, n (%)           | 10/21 (47.6)         | 31/42 (73.8)         | 3.10 (1.03; 9.30)              | 0.040   |
| Prev. stroke, n (%)                  | 5/21 (23.8)          | 5/43 (11.6)          | 0.42 (0.11; 1.66)              | 0.275   |
| PAD, n (%)                           | 3/21 (14.3)          | 13/43 (30.2)         | 2.60 (0.65; 10.38)             | 0.167   |
| COPD, n (%)                          | 8/21 (38.1)          | 10/43 (23.3)         | 0.49 (0.16; 1.52)              | 0.215   |
| CKD stage ≥3b                        | 7/20 (35.0)          | 26/41 (63.4)         | 3.22 (1.05; 9.84)              | 0.037   |
| Immunosuppressive<br>Therapy         | 3/21 (14.3)          | 8/43 (18.6)          | 1.37 (0.32; 5.81)              | 1.000   |
| LV-ejection fraction [%]             | 57 (51; 65)          | 52 (43; 64)          | -0.01 (-0.34; 0.44)            | 0.352   |



|                                            |               |               |                     |       |
|--------------------------------------------|---------------|---------------|---------------------|-------|
| p mean aortic valve prosthesis, mmHg       | 10 (7; 20)    | 11 (7; 19)    | -0.02 (-0.37; 0.49) | 0.792 |
| AI $\geq$ 2, n (%)                         | 4/21 (19.0)   | 1/38 (2.6)    | 0.12 (0.01; 1.11)   | 0.049 |
| MI $\geq$ 2, n (%)                         | 1/21 (4.8)    | 10/38 (26.3)  | 7.14 (0.85; 60.36)  | 0.077 |
| TI $\geq$ 2, n (%)                         | 2/21 (9.5)    | 7/37 (18.9)   | 2.22 (0.42; 11.81)  | 0.465 |
| <b>Procedural characteristics for TAVR</b> |               |               |                     |       |
| Indication                                 |               |               |                     |       |
| Native valve                               | 19/21 (90.5)  | 42/43 (97.7)  | 0.23 (0.02; 2.65)   | 0.249 |
| valve-in-valve                             | 2/21 (9.5)    | 1/43 (2.3)    |                     |       |
| Type of Valve                              |               |               |                     |       |
| All self-expandable, n (%)                 | 10/21 (47.6)  | 27/43 (62.8)  | 0.54 (0.19; 1.55)   | 0.249 |
| All balloon-expandable, n (%)              | 11/21 (52.4)  | 16/43 (37.2)  |                     |       |
| Access site                                |               |               |                     |       |
| Trans-femoral, n (%)                       | 19/21 (90.5)  | 38/43 (88.4)  | 1.25 (0.22; 7.05)   | 1.000 |
| Trans-apical, n (%)                        | 2/21 (9.5)    | 5/43 (11.6)   |                     |       |
| Procedure Time [min]                       | 41 (33; 48)   | 50 (38; 59)   | 0.37 (-0.10; 0.98)  | 0.138 |
| Contrast dye [ml]                          | 105 (88; 123) | 120 (90; 160) | 0.37 (-0.05; 0.90)  | 0.097 |
| Post-dilatation, n (%)                     | 6/19 (31.6)   | 12/42 (28.6)  | 0.87 (0.27; 2.81)   | 0.811 |
| Device success, n (%)                      | 15/21 (71.4)  | 40/43 (93.0)  | 5.33 (1.18; 24.09)  | 0.049 |

|                                            |                |                |                     |       |
|--------------------------------------------|----------------|----------------|---------------------|-------|
| Residual AI $\geq$ grade 2, n (%)          | 3/19 (15.8)    | 3/34 (8.8)     | 0.52 (0.09; 2.85)   | 0.655 |
| Residual mean gradient [mmHg]              | 10 (7; 16)     | 9 (7; 14)      | -0.05 (-0.38; 0.41) | 0.933 |
| Aortic valve area [cm <sup>2</sup> ]       | 1.7 (1.5; 2.6) | 1.7 (1.4; 2.0) | -0.16 (-0.50; 0.36) | 0.473 |
| VARC Myocardial infarction, n (%)          | 0/21 (0)       | 0/42 (0)       | n.a.                | n.a.  |
| VARC Stroke, n (%)                         | 2/21 (9.5)     | 2/43 (4.7)     | 0.46 (0.06; 3.54)   | 0.592 |
| VARC Renal Failure, n (%)                  | 4/21 (19.0)    | 9/43 (20.9)    | 1.13 (0.30; 4.19)   | 1.000 |
| VARC Bleeding, n (%)                       | 4/21 (19.0)    | 18/43 (41.9)   | 3.06 (0.88; 10.64)  | 0.071 |
| VARC Access site complication, n (%)       | 6/21 (28.6)    | 9/43 (20.9)    | 0.66 (0.20; 2.19)   | 0.540 |
| New PPM/ICD, n (%)                         | 4/21 (19.0)    | 11/43 (25.6)   | 1.46 (0.40; 5.29)   | 0.562 |
| <b>Endocarditis features</b>               |                |                |                     |       |
| Definite Endocarditis, n (%)               | 19/21 (90.5)   | 39/43 (90.7)   | 1.03 (0.17; 6.11)   | 1.000 |
| Early Endocarditis, n (%)                  | 15/21 (71.4)   | 29/43 (67.4)   | 0.83 (0.27; 2.60)   | 0.747 |
| Time from TAVR, days                       | 149 (39; 401)  | 197 (29; 594)  | 0.16 (-0.20; 0.63)  | 0.436 |
| Nosocomial / health care associated, n (%) | 6/21 (28.6)    | 21/43 (48.8)   | 2.39 (0.78; 7.31)   | 0.123 |
| <b>Initial symptoms</b>                    |                |                |                     |       |
| Predisposition, n (%)                      | 21/21 (100)    | 43/43 (100)    | n.a.                | n.a.  |

|                                                 |              |              |                     |       |
|-------------------------------------------------|--------------|--------------|---------------------|-------|
| Fever >38.0%, n (%)                             | 20/21 (95.2) | 34/42 (81.0) | 0.21 (0.03; 1.83)   | 0.251 |
| Vascular phenomena, n (%)                       | 3/21 (14.3)  | 9/43 (20.9)  | 1.59 (0.38; 6.61)   | 0.736 |
| Heart Failure, n (%)                            | 10/21 (47.6) | 28/42 (66.7) | 2.20 (0.76; 6.41)   | 0.145 |
| Sepsis/septic shock, n (%)                      | 2/21 (9.5)   | 22/42 (52.4) | 10.45 (2.16; 50.63) | 0.001 |
| Indication for cardiac surgery, n (%)           | 12/21 (57.1) | 38/42 (90.5) | 7.13 (1.86; 27.34)  | 0.006 |
| Indication Heart failure, n (%)                 | 7/21 (33.3)  | 21/42 (50.0) | 2.00 (0.67; 5.95)   | 0.209 |
| Indication sepsis/septic shock, n (%)           | 7/21 (33.3)  | 29/42 (69.0) | 4.46 (1.46; 13.65)  | 0.007 |
| Indication large vegetation, n (%)              | 6/21 (28.6)  | 26/42 (61.9) | 4.06 (1.31; 12.62)  | 0.013 |
| Indication structural complication, n (%)       | 4/21 (19.0)  | 14/42 (33.3) | 2.13 (0.60; 7.52)   | 0.237 |
| Indication systemic embolism, n (%)             | 2/21 (9.5)   | 10/42 (23.8) | 2.97 (0.59; 15.01)  | 0.307 |
| <b>Microbiological findings</b>                 |              |              |                     |       |
| All <i>staphylococci</i> , n (%)                | 5/21 (23.8)  | 18/43 (41.9) | 2.30 (0.71; 7.44)   | 0.158 |
| Coagulase positive <i>staphylococci</i> , n (%) | 4/21 (19.0)  | 13/43 (30.2) | 1.84 (0.52; 6.55)   | 0.341 |
| Coagulase negative <i>staphylococci</i> , n (%) | 1/21 (4.8)   | 5/43 (11.6)  | 2.63 (0.29; 24.09)  | 0.654 |

|                                          |              |              |                    |       |
|------------------------------------------|--------------|--------------|--------------------|-------|
| <i>enterococci</i> , n (%)               | 8/21 (38.1)  | 16/43 (37.2) | 0.96 (0.33; 2.83)  | 0.945 |
| <i>streptococci</i> , n (%)              | 5/21 (23.8)  | 2/43 (4.7)   | 0.16 (0.03; 0.89)  | 0.034 |
| fungi, n (%)                             | 0/21 (0)     | 2/44 (4.7)   | n.a.               | 0.542 |
| others, n (%)                            | 1/21 (4.8)   | 2/43 (4.7)   | 0.98 (0.08; 11.41) | 1.000 |
| BCNIE, n (%)                             | 2/21 (9.5)   | 3/43 (7.0)   | 0.71 (0.11; 4.63)  | 1.000 |
| <b>Echocardiographic findings</b>        |              |              |                    |       |
| PVE +/- other valve                      | 19/21 (90.5) | 34/43 (79.1) | 0.40 (0.08; 2.03)  | 0.341 |
| Periannular abscess, n (%)               | 4/21 (19.0)  | 14/43 (32.6) | 2.05 (0.58; 7.25)  | 0.259 |
| Other valve, no PVE, n (%)               | 2/21 (9.1)   | 6/42 (14.3)  | n.a.               | 0.704 |
| Other valve + lead, no PVE, n (%)        | 0/21 (0)     | 3/43 (7.0)   | n.a.               | 0.545 |
| <b>Complications during IE treatment</b> |              |              |                    |       |
| Any complication, n (%)                  | 10/21 (47.6) | 31/42 (73.8) | 3.10 (1.03; 9.30)  | 0.040 |
| Need for haemodialysis, n (%)            | 2/21 (9.5)   | 17/42 (40.5) | 6.46 (1.33; 31.42) | 0.012 |
| Cerebral embolism, n (%)                 | 0/21 (0)     | 6/41 (14.6)  | n.a.               | 0.088 |
| Peripheral embolism, n (%)               | 2/21 (9.5)   | 9/41 (22.0)  | 2.67 (0.52; 13.69) | 0.305 |
| Limb ischemia, n (%)                     | 0/21 (0)     | 2/41 (4.9)   | n.a.               | 0.545 |
| Bowl ischemia, n (%)                     | 0/21 (0)     | 2/41 (4.9)   | n.a.               | 0.545 |

|                             |              |              |                    |       |
|-----------------------------|--------------|--------------|--------------------|-------|
| CPR, n (%)                  | 1/21 (4.8)   | 6/41 (14.6)  | 3.43 (0.39; 30.55) | 0.406 |
| >6 RBC within 24 h, n (%)   | 0/21 (0)     | 7/41 (17.1)  | n.a.               | 0.084 |
| ARDS, n (%)                 | 0/21 (0)     | 1/41 (2.4)   | n.a.               | 1.000 |
| LCO, n (%)                  | 1/21 (4.8)   | 6/41 (14.6)  | 3.43 (0.39; 30.55) | 0.406 |
| Critical illness PNP, n (%) | 1/22 (4.5)   | 1/41 (2.4)   | 0.50 (0.03; 8.42)  | 1.000 |
| Seizures, n (%)             | 2/21 (9.5)   | 2/41 (4.9)   | 0.49 (0.06; 3.73)  | 0.599 |
| <b>Therapy</b>              |              |              |                    |       |
| surgery                     | 7/21 (33.3)  | 14/21 (66.7) | 1.15 (0.38; 3.52)  | 0.802 |
| Antibiotics only            | 13/43 (30.2) | 30/43 (69.8) |                    |       |

Variables are expressed as numbers and percentages, means  $\pm$  standard deviation or median (25th - 75th percentile) as appropriate. Treatment effect is given as odds ratio (OR) and standardized mean difference (SMD). BCNIE indicates blood culture negative infective endocarditis; CAD, coronary artery disease; CKD stage, chronic kidney disease stage; COPD, chronic obstructive lung disease; ICD, implantable cardioverter defibrillator; NYHA class, New York Heart Association class; PAD, peripheral artery disease; PPM, permanent pacemaker; PCI, percutaneous coronary intervention; RBC; red packed blood cells; STS, Society of Thoracic Surgeons score.

**Table S5. Predictors of 1-year mortality (unmatched cohort).**

|                                         | <b>Univariate</b>   | <b>p-value</b> | <b>Multivariate</b> | <b>p-value</b> |
|-----------------------------------------|---------------------|----------------|---------------------|----------------|
|                                         | <b>HR (95%-CI)</b>  |                | <b>HR (95%-CI)</b>  |                |
| <b>Baseline (at diagnosis of IE)</b>    |                     |                |                     |                |
| Age (per 1 year increase)               | 0.99 (0.95; 1.04)   | 0.815          |                     |                |
| Male Sex                                | 0.68 (0.37; 1.24)   | 0.205          |                     |                |
| BMI (per 1 kg/m <sup>2</sup> increase)  | 1.00 (0.94; 1; .05) | 0.851          |                     |                |
| STS-Score (per 10% increase)            | 1.17 (1.04; 1.31)   | 0.011          | 1.02 (0.99; 1.04)   | 0.105          |
| NYHA III/IV                             | 0.65 (0.33; 1.27)   | 0.208          |                     |                |
| CAD                                     | 1.63 (0.89; 2.98)   | 0.113          |                     |                |
| Diabetes mellitus                       | 1.67 (0.91; 3.07)   | 0.095          |                     |                |
| Atrial fibrillation/flutter             | 1.83 (0.91; 3.66)   | 0.088          |                     |                |
| Prev. stroke                            | 0.65 (0.20; 2.10)   | 0.470          |                     |                |
| PAD                                     | 1.48 (0.77; 2.83)   | 0.241          |                     |                |
| COPD                                    | 0.66 (0.33; 1.35)   | 0.257          |                     |                |
| CKD stage ≥3b                           | 2.69 (1.40; 5.16)   | 0.003          | 1.68 (0.82; 3.42)   | 0.157          |
| Immunosuppressive Therapy               | 1.40 (0.65; 3.02)   | 0.391          |                     |                |
| LV-ejection fraction (per 10% decrease) | 1.09 (0.85; 1.39)   | 0.502          |                     |                |
| AI ≥2                                   | 0.18 (0.03; 1.34)   | 0.095          |                     |                |

|                                     |                    |        |                    |        |
|-------------------------------------|--------------------|--------|--------------------|--------|
| MI ≥2                               | 2.82 (1.34; 5.92)  | 0.006  | 2.91 (1.33; 6.37)  | 0.008  |
| TI ≥2                               | 1.28 (0.56; 2.92)  | 0.562  |                    |        |
| Balloon vs. self-expandable         | 0.65 (0.35; 1.21)  | 0.178  |                    |        |
| Access site                         | 0.94 (0.37; 2.40)  | 0.903  |                    |        |
| Post-dilatation                     | 1.06 (0.54; 2.08)  | 0.858  |                    |        |
| VARC success                        | 2.58 (0.80; 8.38)  | 0.114  |                    |        |
| <b>Endocarditis features</b>        |                    |        |                    |        |
| Initial Heart failure               | 1.70 (0.89; 3.24)  | 0.107  |                    |        |
| Initial Sepsis                      | 4.12 (2.20; 7.72)  | <0.001 | 4.03 (1.97; 8.24)  | <0.001 |
| Definite Endocarditis               | 0.70 (0.25; 2.00)  | 0.510  |                    |        |
| Early Endocarditis                  | 1.09 (0.58; 2.07)  | 0.784  |                    |        |
| Nosocomial / health care associated | 2.04 (1.11; 3.77)  | 0.022  | 1.12 (0.54; 2.31)  | 0.766  |
| <b>OP indications</b>               |                    |        |                    |        |
| Any Indication for cardiac surgery  | 4.17 (1.48; 11.76) | 0.007  | 6.20 (1.80; 21.41) | 0.004  |
| <b>Microbiological findings</b>     |                    |        |                    |        |
| <i>Staphylococci</i> vs. others     | 1.75 (0.95; 3.22)  | 0.072  |                    |        |
| <b>Echocardiographic findings</b>   |                    |        |                    |        |
| PVE vs. other location              | 0.62 (0.30; 1.30)  | 0.205  |                    |        |

|                                     |                   |       |                   |       |
|-------------------------------------|-------------------|-------|-------------------|-------|
| Periannular abscess                 | 1.61 (0.85; 3.05) | 0.147 |                   |       |
| <b>Complications prior to death</b> |                   |       |                   |       |
| Any complication                    | 2.36 (1.18; 4.73) | 0.015 | 1.79 (0.86; 3.71) | 0.118 |
| <b>Therapy</b>                      |                   |       |                   |       |
| Antibiotics vs. surgery             | 1.29 (0.67; 2.48) | 0.444 | 1.66 (0.77; 3.59) | 0.196 |

BMI indicates body mass index; CAD, coronary artery disease; CKD stage, chronic kidney disease stage; COPD, chronic obstructive lung disease; NYHA class, New York Heart Association class; PAD, peripheral artery disease; PVE, prosthetic valve endocarditis; STS, Society of Thoracic Surgeons score; VARC, valve academic research consortium.
